# Supplementary material for: Components of the ribosome biogenesis pathway underlie establishment of telomere length set point in Arabidopsis
Source: PubMed Central journal article supplement (PMC6889149; doi:10.1038/s41467-019-13448-z), 2019-12-02
Supplement: 41467_2019_13448_MOESM3_ESM.pdf [file 41467_2019_13448_MOESM3_ESM.pdf]

## **Description of Additional Supplementary Files**

File Name: Supplementary Data 1

Description: Telomere length measurement data for 19 MAGIC founder genotypes.

File Name: Supplementary Data 2

Description: Telomere length measurement data for 480 MAGIC lines.

File Name: Supplementary Data 3

Description: List of Chr 5 QTL candidate genes with one or more Sf-2 specific DNA polymorphisms.

File Name: Supplementary Data 4

Description: List of Chr 5 QTL candidate genes with unique expression pattern in Sf-2 ecotype.

File Name: Supplementary Data 5

Description: Telomere length phenotypes of mutant plant lines with T-DNA insertions inside selected Chr 5 QTL interval genes.

File Name: Supplementary Data 6

Description: Nucleotide sequence polymorphism in the NOP2A locus in Col-0 and Sf-2 parents.

File Name: Supplementary Data 7

Description: Summary of fold changes in NOP2A transcript level in the 18 MAGIC founder genotypes over Col-0 reference genotype.
